# Supplementary material for: Neuroprotective Effects of Methyl Caffeate against Hydrogen Peroxide-Induced Cell Damage: Involvement of Caspase 3 and Cathepsin D Inhibition
Source: MDPI journal article supplement (doi:10.3390/biom10111530), 2020-11-09
Supplement: s1 [file s1]

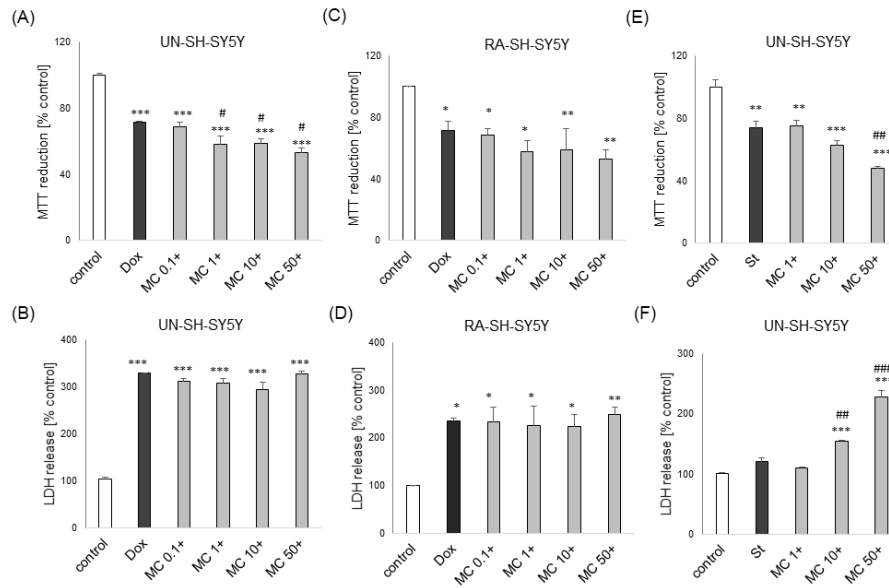

**Figure S1.** The effect of MC on SH-SY5Y cell damage induced by doxorubicin and staurosporine.

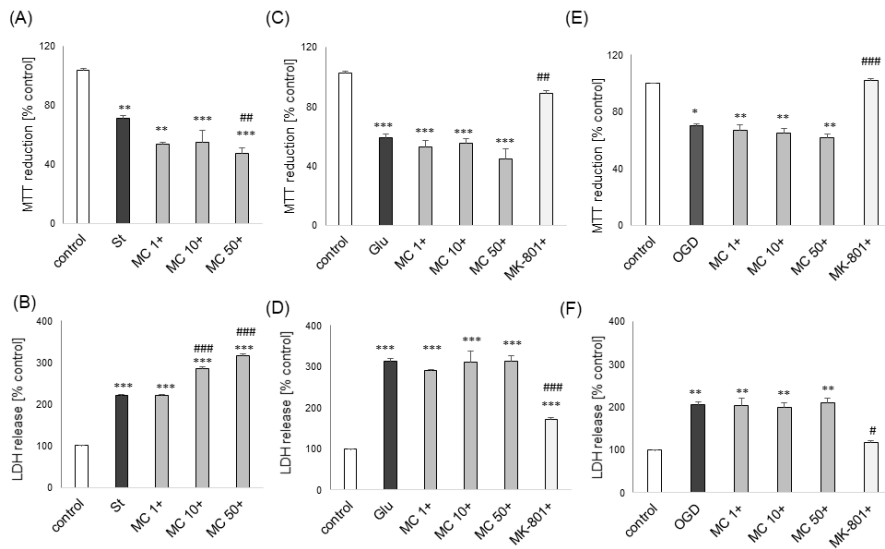

**Figure S2.** The effect of MC in primary neuronal cell damage induced by apoptotic (staurosporine) and excitotoxic (glutamate, oxygen glucose deprivation) factors.
